# Supplementary material
Source: Elsevier journal article supplement (https://www.sciencedirect.com/science/article/pii/S0210480616301589)
Supplement: mmc1 [file S0210480616301589:mmc1.docx]

Anexo 1. Descripción del contenido del cuestionario EDITS

|  |
| --- |
| 1. En general, ¿ está usted satisfecho con el tratamiento? De 0 a 4 |
| 2. Durante las últimas 4 semanas, ¿hasta qué punto ha satisfecho el tratamiento sus expectativas? De 0 a 4 |
| 3. ¿Considera probable seguir utilizando este tratamiento? De 0 a 4 |
| 4. Durante las últimas 4 semanas, ¿le ha sido fácil emplear este tratamiento? De 0 a 4 |
| 5. Durante las últimas 4 semanas, ¿se ha sentido satisfecho con lo rápido que actúa el tratamiento? De 0 a 4 |
| 6. Durante las últimas 4 semanas, ¿se ha sentido satisfecho con la duración de los efectos del tratamiento? De 0 a 4 |
| 7. Este tratamiento, ¿le ha hecho sentir confianza en sus propias posibilidades para mantener relaciones sexuales? De 0 a 4 |
| 8. En general, ¿se siente satisfecha su pareja con los efectos del tratamiento? De 0 a 4 |
| 9. ¿Qué opina su pareja de que usted continúe con este tratamiento? De 0 a 4 |
| 10. Durante las últimas 4 semanas, ¿la erección ha sido natural? De 0 a 4 |
| 11. Durante las últimas 4 semanas, ¿ha encontrado diferencias en la firmeza de la erección con respecto a cuando usted no tenía problemas de erección? De 0 a 4 |
| Las posibles respuestas son específicas para cada pregunta (rango de 0 a 4):  0 = muy insatisfecho/nada/muy improbable/ muy difícil de usar.  4 = muy satisfecho/completamente/muy probable/muy fácil de usar.  La puntuación del cuestionario EDITS se calcula multiplicando por 25 la media de la puntuación de las 11 preguntas. |

EDITS: Erectile Dysfunction Inventory of Treatment Satisfaction
